# Supplementary material for: Unique nanosheet–nanowire structured CoMnFe layered triple hydroxide arrays as self-supporting electrodes for a high-efficiency oxygen evolution reaction
Source: Royal Society of Chemistry journal article supplement (doi:10.1039/c9ta01531k), 2019-01-01
Supplement: c9ta01531k1.pdf [file c9ta01531k1.pdf]

## Supplemental Information

Unique nanosheet-nanowire structured CoMnFe layered triple hydroxide arrays as self-supporting electrodes for high-efficiency oxygen evolution reaction

Meichen Guo, Lingxi Zhou, Yao Li, Qiaoji Zheng, Fengyu Xie, Dunmin Lin\*

College of Chemistry and Materials Science, Sichuan Normal University, Chengdu  
610066, China

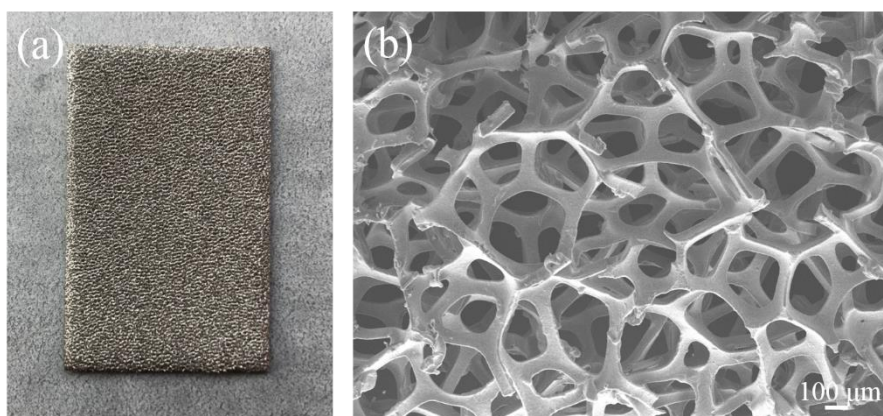

Figure S1. Photograph and SEM image of Ni foam.

---

\* Corresponding author: Email: [ddmd222@sicnu.edu.cn](mailto:ddmd222@sicnu.edu.cn) (Dunmin Lin); Fax: [+86 28 84760802](tel:+862884760802) Tel: [+86 28 84760802](tel:+862884760802)

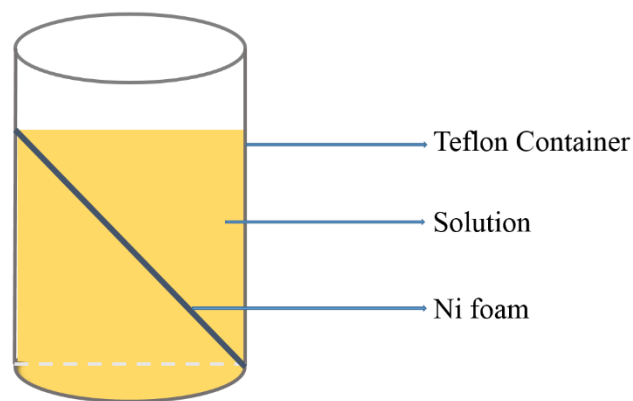

Figure S2. The illustration of the Teflon autoclave apparatus to synthesize materials on Ni foam substrate.

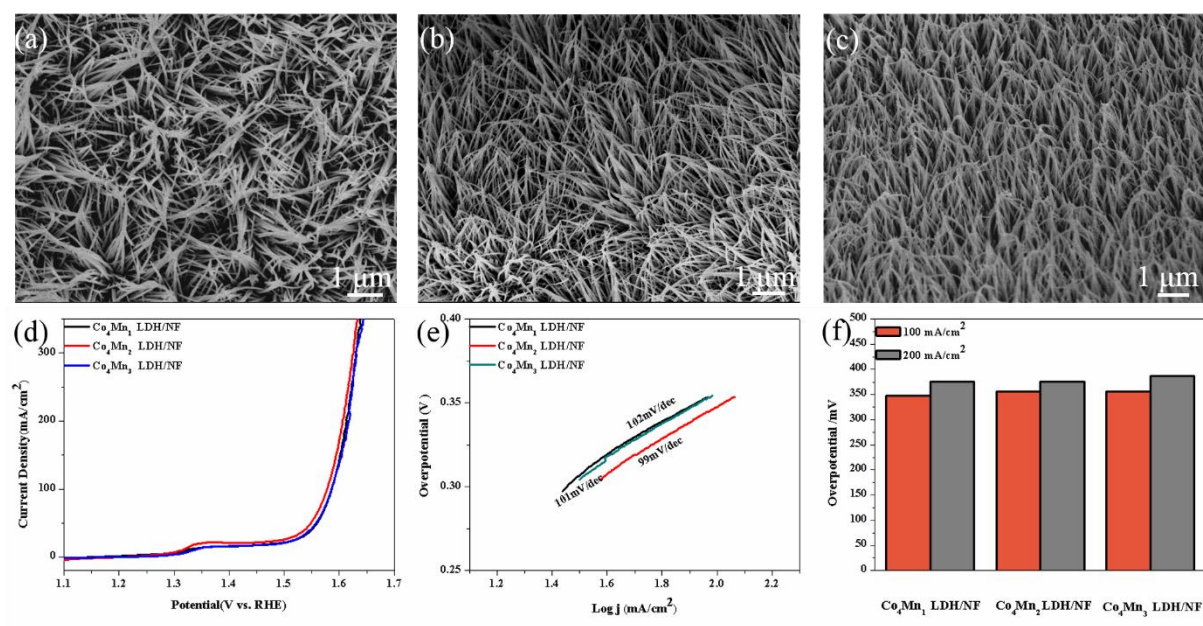

Figure S3. SEM images of (a)  $\text{Co}_4\text{Mn}_1$  LDH/NF, (b)  $\text{Co}_4\text{Mn}_2$  LDH/NF and (c)  $\text{Co}_4\text{Mn}_3$  LDH/NF samples; (d) LSV curves, (e) Tafel plots and (f) corresponding contrast of  $\text{Co}_4\text{Mn}_1$  LDH/NF,  $\text{Co}_4\text{Mn}_2$  LDH/NF and  $\text{Co}_4\text{Mn}_3$  LDH/NF.

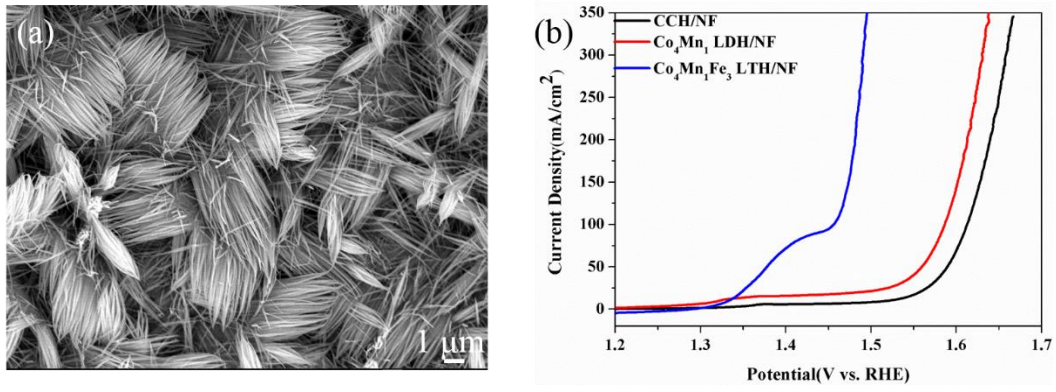

Figure S4. (a) SEM image of CCH/NF; (b) LSV curves of CCH/NF, Co<sub>4</sub>Mn<sub>1</sub> LDH/NF and Co<sub>4</sub>Mn<sub>1</sub>Fe<sub>3</sub> LTH/NF.

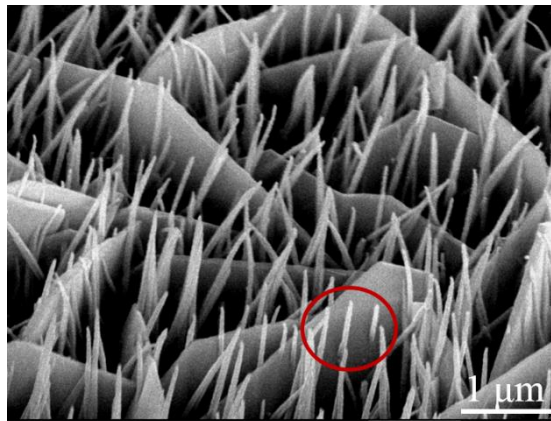

Figure S5. SEM image of Co<sub>4</sub>Mn<sub>1</sub>Fe<sub>3</sub> LTH/NF.

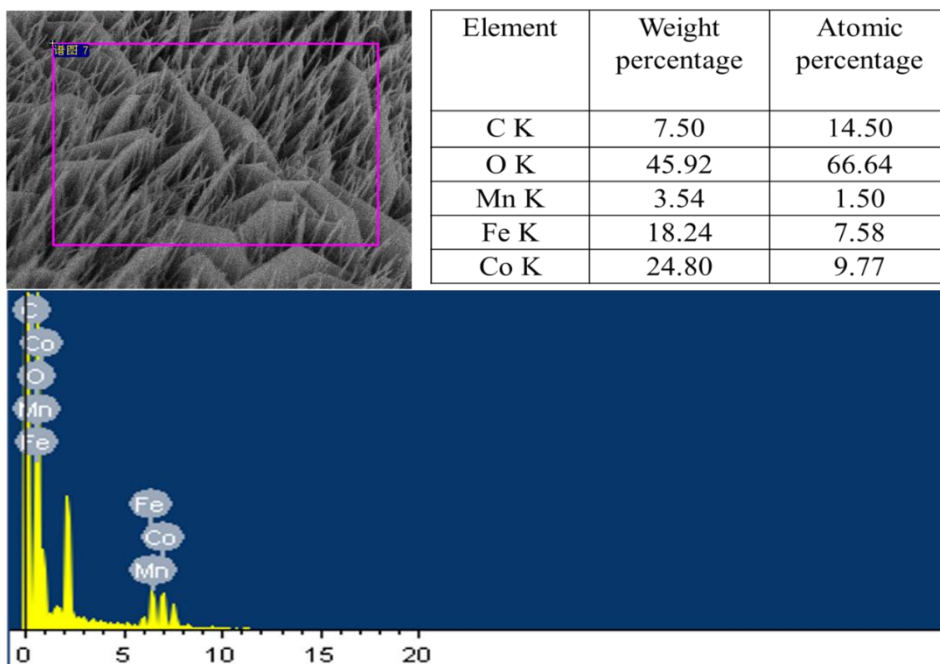

Figure S6. The EDS elemental analysis of  $\text{Co}_4\text{Mn}_1\text{Fe}_3$  LTH/NF.

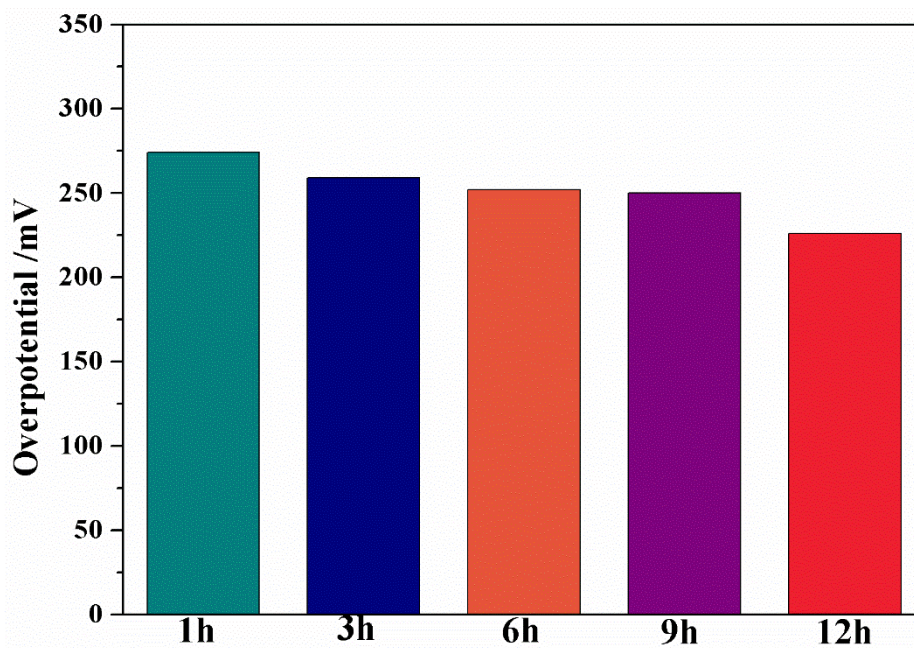

Figure S7. overpotentials of  $\text{Co}_4\text{Mn}_1\text{Fe}_3$  LTH/NF with different hydrothermal treatment time at  $J = 100 \text{ mA cm}^{-2}$ .

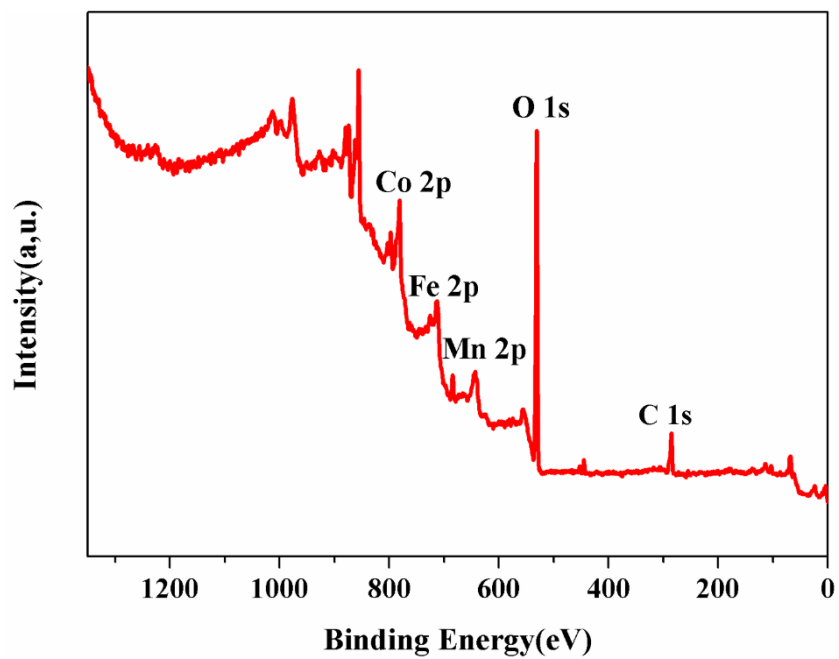

Figure S8. XPS survey spectra of Co<sub>4</sub>Mn<sub>1</sub>Fe<sub>3</sub> LTH/NF.

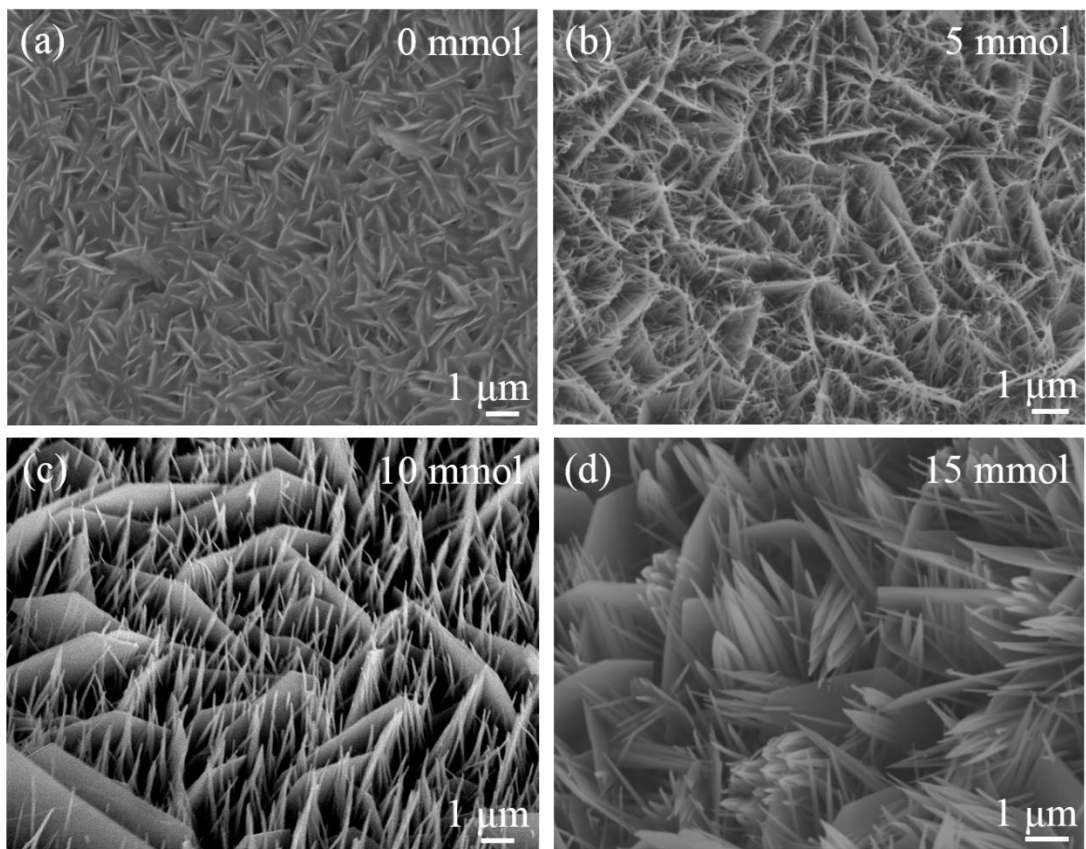

Figure S9. SEM images of Co<sub>4</sub>Mn<sub>1</sub>Fe<sub>3</sub> LTH/NF containing different NH<sub>4</sub>F amounts.

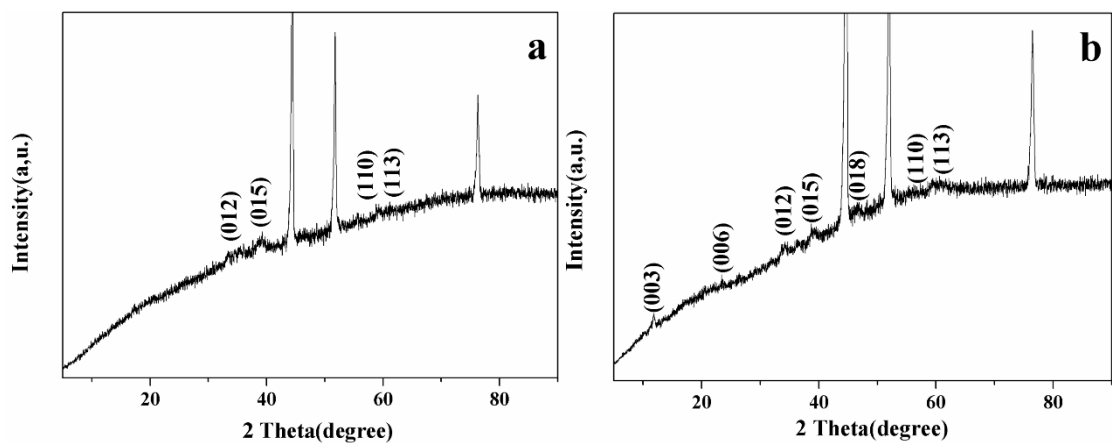

Figure S10. XRD data of (a) Co<sub>4</sub>Mn<sub>1</sub> LDH/NF and (b) Co<sub>4</sub>Mn<sub>1</sub>Fe<sub>1</sub> LTH/NF.



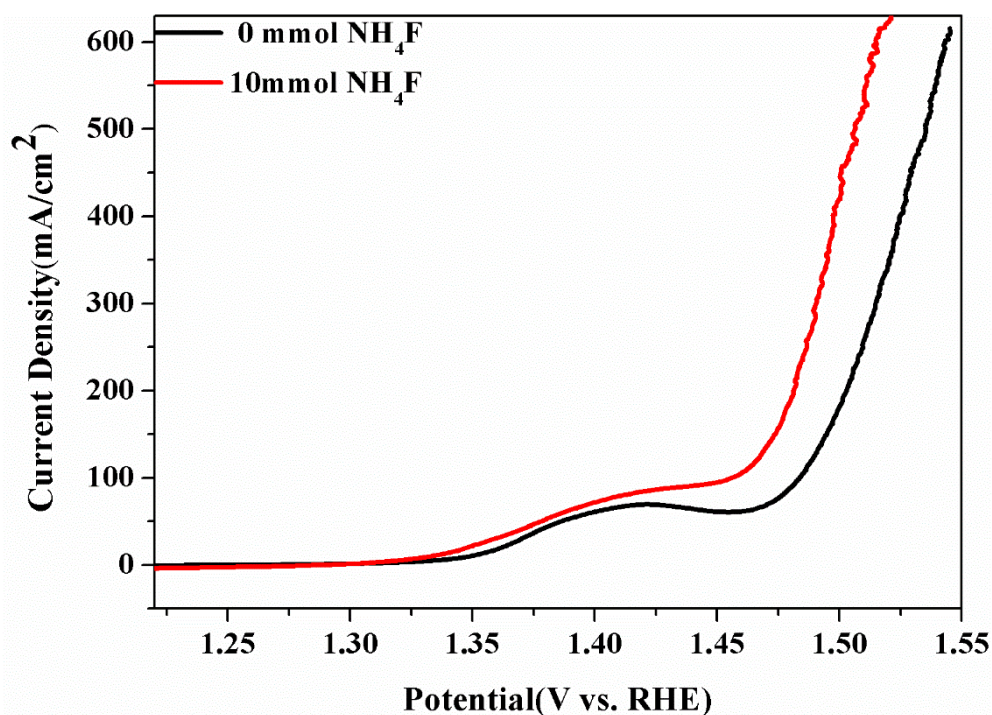

Figure S11. LSV curves of  $\text{Co}_4\text{Mn}_1\text{Fe}_3$  LTH/NF containing 10 mmol  $\text{NH}_4\text{F}$  or not.

Table S1. Comparison of catalytic performance of  $\text{Co}_4\text{Mn}_1\text{Fe}_3$  LTH/NF to recently reported high performance LDH-based OER electrocatalysts

| LDH-based electrocatalysts              | Electrolyte | Current density<br>[ $\text{mA cm}^{-2}$ ] | Overpotential<br>for OER [mV] | Tafel slope<br>[ $\text{mV decade}^{-1}$ ] | reference |
|-----------------------------------------|-------------|--------------------------------------------|-------------------------------|--------------------------------------------|-----------|
| NiFe LDHs                               | 1M KOH      | 10                                         | $\approx 350$                 | 64                                         | [S1]      |
| NiV LDHs                                | 1M KOH      | 10                                         | $\approx 310$                 | 50                                         | [S1]      |
| CoMn LDHs                               | 1M KOH      | 10                                         | 324                           | 43                                         | [S2]      |
| NiFe-LDH HMS                            | 1M KOH      | 10                                         | 239                           | 53                                         | [S3]      |
| Cu@NiFe LDHs                            | 1M KOH      | 10                                         | 199                           | 27.8                                       | [S4]      |
| NiFe-LDH/ $\text{NiCo}_2\text{O}_4$ /NF | 1M KOH      | 50                                         | 350                           | 53                                         | [S5]      |
| $\text{NiCo}_2\text{S}_4$ @NiFe-LDH/NF  | 1M KOH      | 60                                         | 201                           | 46.3                                       | [S6]      |
| FeOOH/NiFe-LDH/NF                       | 1M KOH      | 10                                         | 208                           | -                                          | [S7]      |
| NiFe:Pi/NiFe-LDH/CFP                    | 1M KOH      | 10                                         | 290                           | 38                                         | [S8]      |

|                                                        |          |     |      |       |           |
|--------------------------------------------------------|----------|-----|------|-------|-----------|
| CoSe/NiFe-LDH/EG                                       | 1M KOH   | 150 | 270  | 57    | [S9]      |
| NiFeCo LDHs                                            | 1M KOH   | 10  | 220  | 42    | [S10]     |
| NiFeMn LDHs                                            | 1M KOH   | 20  | 289  | 47    | [S11]     |
| NiCoFe LTHs/CFC                                        | 1M KOH   | 10  | 239  | 32    | [S12]     |
| MoO <sup>4-</sup> /NiFe LDHs                           | 1M KOH   | 10  | 280  | 40    | [S13]     |
| PO <sub>4</sub> <sup>3-</sup> /NiFe LDH                | 1M KOH   | 10  | ≈260 | ≈42.1 | [S14]     |
| HPO <sub>3</sub> <sup>2-</sup> /NiFe LDH               | 1M KOH   | 10  | ≈270 | ≈40.6 | [S14]     |
| H <sub>2</sub> PO <sub>2</sub> <sup>3-</sup> /NiFe LDH | 1M KOH   | 10  | ≈240 | ≈37.7 | [S14]     |
| CO <sub>3</sub> <sup>2-</sup> /NiFe LDH                | 1M KOH   | 10  | ≈330 | ≈44.3 | [S14]     |
| Exfoliated NiFe LDHs                                   | 1M KOH   | 10  | 300  | 40    | [S15]     |
| Exfoliated NiCo LDH                                    | 1M KOH   | 10  | 330  | 41    | [S15]     |
| Exfoliated CoCo LDH                                    | 1M KOH   | 10  | 350  | 45    | [S15]     |
| Exfoliated NiCo LDH/CP                                 | 1M KOH   | 10  | 300  | 40    | [S16]     |
| H <sub>2</sub> O-plasma exfoliated<br>CoFe LDHs        | 1M KOH   | 10  | 290  | 36    | [S17]     |
| Ar-CoFe LDHs                                           | 1M KOH   | 10  | 266  | 37.6  | [S18]     |
| Defect-rich ultrathin CoFe<br>LDHs                     | 1M KOH   | 10  | 300  | 40    | [S19]     |
| NiFe LDHs/NF                                           | 1M NaOH  | 10  | 240  | -     | [S20]     |
| Ni <sub>3</sub> Fe LDH@NF                              | 1M KOH   | 10  | 210  | 59    | [S21]     |
| NiFe LDHs/CNTs                                         | 1M KOH   | 5   | ≈250 | 31    | [S22]     |
| CNF/Fe-doped Ni LDH                                    | 1M KOH   | 10  | 220  | 34    | [S23]     |
| NiFe-rGO LDH hybrid                                    | 1M KOH   | 10  | 206  | 39    | [S24]     |
| nNiFe LDH/NGF                                          | 0.1M KOH | 10  | 337  | 45    | [S25]     |
| CoAl LDH/3DGN                                          | 1M KOH   | 10  | 252  | 36    | [S26]     |
| NiFe LDH-NS@DG hybrid                                  | 1M KOH   | 10  | 210  | 52    | [S27]     |
| CQD/NiFe LDH hybrid                                    | 1M KOH   | 10  | ≈235 | 30    | [S28]     |
| Co <sub>4</sub> Mn <sub>1</sub> Fe <sub>3</sub> LDH/NF | 1M KOH   | 10  | 200  | 55    | This work |

Table S2. The ICP results of metal contents and atomic ratios of Co: Mn: Fe in all the



catalytic systems.

| Sample                                                 | Content (%) (Co, Mn, Fe) | Atomic ratio (Co: Mn: Fe) |
|--------------------------------------------------------|--------------------------|---------------------------|
| Co <sub>4</sub> Mn <sub>1</sub> LDH/NF                 | 11.87%, 2.58%, 0.00%     | 0.81: 0.19: 0             |
| Co <sub>4</sub> Mn <sub>1</sub> Fe <sub>1</sub> LTH/NF | 7.42%, 1.15%, 1.68%      | 0.71: 0.12: 0.17          |
| Co <sub>4</sub> Mn <sub>1</sub> Fe <sub>2</sub> LTH/NF | 7.62%, 1.35%, 2.15%      | 0.67: 0.13: 0.20          |
| Co <sub>4</sub> Mn <sub>1</sub> Fe <sub>3</sub> LTH/NF | 7.01%, 0.77%, 3.67%      | 0.60: 0.07: 0.33          |
| Co <sub>4</sub> Mn <sub>1</sub> Fe <sub>4</sub> LTH/NF | 8.75%, 1.45%, 9.60%      | 0.43: 0.07: 0.50          |

## References

- [S1] K. Fan, H. Chen, Y. F. Ji, H. Huang, P. M. Claesson, Q. Daniel, B. Philippe, H. Rensmo, F. S. Li, Y. Luo and L. C. Sun, *Nat. Commun.*, 2016, 7, 11981.
- [S2] F. Song and X. L. Hu, *J. Am. Chem. Soc.*, 2014, 136, 16481-16484.
- [S3] C. Zhang, M. F. Shao, L. Zhou, Z. H. Li, K. M. Xiao and M. Wei, *ACS Appl. Mater. Interfaces*, 2016, 8, 33697-33703.
- [S4] Y. Luo, H. Q. Zhou, J. Y. Sun, F. Qin, F. Yu, J. M. Bao, Y. Yu, S. Chen and Z. F. Ren, *Energy Environ. Sci.*, 2017, 10, 1820-1827.
- [S5] Z. Q. Wang, S. Zeng, W. H. Liu, X. W. Wang, Q. W. Li, Z. G. Zhao and F. X. Geng, *ACS Appl. Mater. Interfaces*, 2017, 9, 1488-1495.
- [S6] J. Liu, J. S. Wang, B. Zhang, Y. J. Ruan, L. Lv, X. Ji, K. Xu, L. Miao and J. J. Jiang, *ACS Appl. Mater. Interfaces*, 2017, 9, 15364-15372.

- [S7] J. Chi, H. M. Yu, B. W. Qin, L. Fu, J. Jia, B. L. Yi and Z. G. Shao, *ACS Appl. Mater. Interfaces*, 2016, 9, 464-471.
- [S8] Y. B. Li and C. Zhao, *ACS Catal.*, 2017, 7, 2535-2541.
- [S9] Y. Hou, M. R. Lohe, J. Zhang, S. H. Liu, X. D. Zhuang and X. L. Feng, *Energ. Environ. Sci.*, 2016, 9, 478-483.
- [S10] X. Long, S. Xiao, Z. L. Wang, X. L. Zheng and S. H. Yang, *Chem. Commun.*, 2015, 51, 1120-1123.
- [S11] Z. Y. Lu, L. Qian, Y. Tian, Y. P. Li, X. M. Sun and X. Duan, *Chem. Commun.*, 2016, 52, 908-911.
- [S12] A.-L. Wang, H. Xu and G.-R. Li, *ACS Energy Lett.*, 2016, 1, 445-453.
- [S13] N. Han, F. P. Zhao and Y. G. Li, *J. Mater. Chem. A*, 2015, 3, 16348-16353.
- [S14] M. Luo, Z. Cai, C. Wang, Y. M. Bi, L. Qian, Y. C. Hao, L. Li, Y. Kuang, Y. P. Li, X. D. Lei, Z. Y. Huo, W. Liu, H. L. Wang, X. M. Sun and X. Duan, *Nano Res.*, 2017, 10, 1732-1739.
- [S15] F. Song and X. L. Hu, *Nat. Commun.*, 2014, 5, 4477.
- [S16] H. F. Liang, F. Meng, M. Cabán-Acevedo, L. S. Li, A. Forticaux, L. C. Xiu, Z. C. Wang and S. Jin, *Nano Lett.*, 2015, 15, 1421-1427.
- [S17] R. Liu, Y. Y. Wang, D. D. Liu, Y. Q. Zou and S. Y. Wang, *Adv. Mater.*, 2017, 29, 1701546.
- [S18] Y. Y. Wang, Y. Q. Zhang, Z. Q. Liu, C. Xie, S. Feng, D. D. Liu, M. F. Shao and S. Y. Wang, *Angew. Chem., Int. Ed.*, 2017, 56, 5867-5871.

- [S19]P. F. Liu, S. Yang, B. Zhang and H. G. Yang, ACS Appl. Mater. Interfaces, 2016, 8, 34474-34481.
- [S20]J. S. Luo, J.-H. Im, M. T. Mayer, M. Schreier, M. K. Nazeeruddin, N.-G. Park, S. D. Tilley, H. J. Fan and M. Grätzel, Science, 2014, 34, 1593-1596.
- [S21]Y. Zhang, Q. Shao, Y. C. Pi, J. Guo and X. Q. Huang, Small, 2017, 13, 1700355.
- [S22]M. Gong, Y. G. Li, H. L. Wang, Y. Y. Liang, J. Z. Wu, J. G. Zhou, J. Wang, T. Regier, F. Wei and H. J. Dai, J. Am. Chem. Soc, 2013, 13, 8452-8455.
- [S23]D. D. Zhao, K. Z. Jiang, Y. C. Pi and X. Q. Huang, ChemCatChem, 2017, 9, 84-88.
- [S24]X. Long, J. K. Li, S. Xiao, K. Y. Yan, Z. L. Wang, H. N. Chen and S. H. Yang, Angew. Chem., 2014, 126, 7714-7718.
- [S25]C. Tang, H. S. Wang, H. F. Wang, Q. Zhang, G. L. Tian, J. Q. Nie and F. Wei, Adv. Mater., 2015, 27, 4516-4522.
- [S26]J. F. Ping, Y. X. Wang, Q. P. Lu, B. Chen, J. Z. Chen, Y. Huang, Q. L. Ma, C. L. Tan, J. Yang, X. H. Cao, Z. J. Wang, J. Wu, Y. B. Ying and H. Zhang, Adv. Mater., 2016, 28, 7640-7645.
- [S27]Y. Jia, L. Z. Zhang, G. P. Gao, H. Chen, B. Wang, J. Z. Zhou, M. T. Soo, M. Hong, X. C. Yan, G. G. Qian, J. Zou, A. J. Du and X. D. Yao, Adv. Mater., 2017, 3, 1700017.
- [S28] D. Tang, J. Liu, X. Y. Wu, R. H. Liu, X. Han, Y. Z. Han, H. Huang, Y. Liu and Z. H. Kang, ACS Appl. Mater. Interfaces, 2014, 6, 7918-7925.
